# Supplementary material for: Genetic and structural identification of an O-acyltransferase gene (oacC) responsible for the 3/4-O-acetylation on rhamnose III in Shigella flexneri serotype 6
Source: PubMed Central journal article supplement (PMC4206707; doi:10.1186/s12866-014-0266-7), 2014-10-21
Supplement: 12866_2014_266_MOESM1_ESM.pdf [file 12866_2014_266_MOESM1_ESM.pdf]

**Supplementary Table 1 *Shigella* and *E. coli* strains used for the *oacC* gene PCR detection and anti-O-factor 9 serum specificity evaluation**

| Strains <sup>a</sup> | Species               | Serotypes | <i>oacC</i> gene PCR results | Reactivity with antiserum 9 |
|----------------------|-----------------------|-----------|------------------------------|-----------------------------|
| 51197                | <i>S. dysenteriae</i> | A1        | -                            | -                           |
| 51136                | <i>S. dysenteriae</i> | A2        | -                            | -                           |
| 51196                | <i>S. dysenteriae</i> | A3        | -                            | -                           |
| 51253                | <i>S. dysenteriae</i> | A4        | -                            | -                           |
| 51252                | <i>S. dysenteriae</i> | A5        | -                            | -                           |
| 51258                | <i>S. dysenteriae</i> | A6        | -                            | -                           |
| 51259                | <i>S. dysenteriae</i> | A7        | -                            | -                           |
| 51526                | <i>S. dysenteriae</i> | A8        | -                            | -                           |
| 51527                | <i>S. dysenteriae</i> | A9        | -                            | -                           |
| 51528                | <i>S. dysenteriae</i> | A10       | -                            | -                           |
| 51630                | <i>S. dysenteriae</i> | A11       | -                            | -                           |
| 51631                | <i>S. dysenteriae</i> | A12       | -                            | -                           |
| 51360                | <i>S. boydii</i>      | C1        | -                            | -                           |
| 51361                | <i>S. boydii</i>      | C2        | -                            | -                           |
| 51226                | <i>S. boydii</i>      | C3        | -                            | -                           |
| 3594-74              | <i>S. boydii</i>      | C4        | -                            | -                           |
| 51227                | <i>S. boydii</i>      | C5        | -                            | -                           |
| 51228                | <i>S. boydii</i>      | C6        | -                            | -                           |
| 51586                | <i>S. boydii</i>      | C7        | -                            | -                           |
| 51587                | <i>S. boydii</i>      | C8        | -                            | -                           |
| 51588                | <i>S. boydii</i>      | C9        | -                            | -                           |
| 51469                | <i>S. boydii</i>      | C10       | -                            | -                           |
| 51589                | <i>S. boydii</i>      | C11       | -                            | -                           |
| 51590                | <i>S. boydii</i>      | C12       | -                            | -                           |
| 51531                | <i>S. boydii</i>      | C13       | -                            | -                           |
| 51532                | <i>S. boydii</i>      | C14       | -                            | -                           |
| 51591                | <i>S. boydii</i>      | C15       | -                            | -                           |
| 51632                | <i>S. boydii</i>      | C16       | -                            | -                           |
| 51633                | <i>S. boydii</i>      | C17       | -                            | -                           |
| 51634                | <i>S. boydii</i>      | C18       | -                            | -                           |

|           |                  |    |   |   |
|-----------|------------------|----|---|---|
| 51081     | <i>S. sonnei</i> | I  | - | - |
| 03HL14    | <i>S. sonnei</i> | I  | - | - |
| 1978GZ02  | <i>S. sonnei</i> | I  | - | - |
| 2005163   | <i>S. sonnei</i> | II | - | - |
| 2005186   | <i>S. sonnei</i> | II | - | - |
| 09GS057   | <i>S. sonnei</i> | II | - | - |
| 09GS058   | <i>S. sonnei</i> | II | - | - |
| 09GS076   | <i>S. sonnei</i> | II | - | - |
| 09GS078   | <i>S. sonnei</i> | II | - | - |
| 1978GZ04  | <i>S. sonnei</i> | II | - | - |
| 1982GZ05  | <i>S. sonnei</i> | II | - | - |
| 2008GZ04  | <i>S. sonnei</i> | II | - | - |
| 2009GS081 | <i>S. sonnei</i> | II | - | - |
| 2009GS083 | <i>S. sonnei</i> | II | - | - |
| 2009GS086 | <i>S. sonnei</i> | II | - | - |
| 2009GS088 | <i>S. sonnei</i> | II | - | - |
| 2009GS090 | <i>S. sonnei</i> | II | - | - |
| 2009GS094 | <i>S. sonnei</i> | II | - | - |
| 2009GS095 | <i>S. sonnei</i> | II | - | - |
| 2009GS098 | <i>S. sonnei</i> | II | - | - |
| 2009GS100 | <i>S. sonnei</i> | II | - | - |
| 2009GZ16  | <i>S. sonnei</i> | II | - | - |
| 2009GZ20  | <i>S. sonnei</i> | II | - | - |
| 2009GZ26  | <i>S. sonnei</i> | II | - | - |
| 2009GZ31  | <i>S. sonnei</i> | II | - | - |
| 2009GZ46  | <i>S. sonnei</i> | II | - | - |
| 2009GZ47  | <i>S. sonnei</i> | II | - | - |
| 2010GZ24  | <i>S. sonnei</i> | II | - | - |
| 2010GZ26  | <i>S. sonnei</i> | II | - | - |
| 2010GZ27  | <i>S. sonnei</i> | II | - | - |
| M6381     | <i>S. sonnei</i> | II | - | - |
| ET57      | <i>E. coli</i>   | O6 | - | - |
| ET06      | <i>E. coli</i>   | O8 | - | - |

|           |                                     |         |   |   |
|-----------|-------------------------------------|---------|---|---|
| G1237     | <i>E. coli</i>                      | O13     | - | - |
| 042       | Enteroaggregative<br><i>E. coli</i> | O44:H18 | - | - |
| ET03      | <i>E. coli</i>                      | O71     | - | - |
| MH1278-15 | <i>E. coli</i>                      | O78     | - | - |
| EP001     | <i>E. coli</i>                      | O127    | - | - |
| ET47      | <i>E. coli</i>                      | O128    | - | - |
| EDL933    | Enterohemorrhagic<br><i>E. coli</i> | O157:H7 | - | - |
| ET100     | <i>E. coli</i>                      | O159    | - | - |

---

<sup>a</sup>, all the strains were isolated from diarrhea patients in China, or purchased from the National Institutes for Food and Drug Control (NIFDC).
