# Supplementary material for: Genetic and structural identification of an O-acyltransferase gene (oacC) responsible for the 3/4-O-acetylation on rhamnose III in Shigella flexneri serotype 6
Source: PubMed Central journal article supplement (PMC4206707; doi:10.1186/s12866-014-0266-7), 2014-10-21
Supplement: 12866_2014_266_MOESM2_ESM.pdf [file 12866_2014_266_MOESM2_ESM.pdf]

**Supplementary Table 2 Alignment analysis of genomic region franking *oacC* gene in serotype 6 strain CDC 796-83**

| ORFs <sup>a</sup> | No. amino acid encoded | Database search results                                                                 |              |
|-------------------|------------------------|-----------------------------------------------------------------------------------------|--------------|
|                   |                        | Protein or origin (species, accession no.)                                              | Identity (%) |
| 0262              | 52                     | integrase protein ( <i>S. enterica</i> , <a href="#">WP_001853537</a> )                 | 92           |
| 0263              | 87                     | transposase ( <i>S. flexneri</i> , <a href="#">WP_000774867.1</a> )                     | 99           |
| 0264              | 382                    | OacB ( <i>S. flexneri</i> 2a str. 301, <a href="#">NP_706267</a> )                      | 72           |
| 0265              | 203                    | tail assembly chaperone gp38 ( <i>E. coli</i> ATCC 8739, <a href="#">YP_001725714</a> ) | 96           |
| 0266              | 260                    | phage tail collar domain protein ( <i>E. coli</i> , <a href="#">WP_001494081</a> )      | 99           |
|                   |                        | SfII_23, (SfII, AGQ45513)                                                               | 94           |
| 0267              | 194                    | tail protein (SfV, <a href="#">NP_599052</a> )                                          | 99           |
|                   |                        | tail protein (SfII, <a href="#">YP_008318500</a> )                                      | 98           |
| 0268              | 352                    | tail protein (SfV, <a href="#">NP_599051</a> )                                          | 98           |
|                   |                        | baseplate protein (SfIV, <a href="#">YP_008766882</a> )                                 | 97           |
| 0269              | 141                    | tail protein (SfV, <a href="#">NP_599050</a> )                                          | 99           |
|                   |                        | tail protein (SfII, <a href="#">YP_008318498</a> )                                      | 98           |
| 0270              | 182                    | tail protein (SfV, <a href="#">NP_599049</a> )                                          | 100          |
| 0271              | 359                    | putative phage tail protein ( <i>E. coli</i> , <a href="#">YP_007379831</a> )           | 99           |
| 0272              | 442                    | phage tail/DNA circulation protein ( <i>E. coli</i> , <a href="#">WP_021528953</a> )    | 99           |
| 0273              | 611                    | tail protein (SfV, <a href="#">NP_599046</a> )                                          | 99           |
|                   |                        | phage tail tape measure protein ( <i>E. coli</i> , <a href="#">WP_001583206</a> )       | 99           |
| 0274              | 62                     | hypothetical protein ( <i>E. coli</i> , <a href="#">WP_001303047</a> )                  | 98           |
| 0275              | 89                     | hypothetical protein SfVp13 (SfV, <a href="#">NP_599045</a> )                           | 99           |
| 0276              | 118                    | hypothetical protein SfVp12 (SfV, <a href="#">NP_599044</a> )                           | 98           |

---

|      |     |                                                                                                     |     |
|------|-----|-----------------------------------------------------------------------------------------------------|-----|
| 0277 | 337 | tail sheath protein ( <i>E. coli</i> , <a href="#">WP_001472772</a> )                               | 99  |
| 0278 | 142 | tail sheath protein ( <i>E. coli</i> , <a href="#">WP_000155729</a> )                               | 100 |
| 0279 | 46  | hypothetical protein ( <i>E. coli</i> , <a href="#">WP_001542465</a> )                              | 98  |
|      |     | hypothetical protein SfVp10 (SfV, <a href="#">NP_599042</a> )                                       | 98  |
| 0280 |     | pseudo                                                                                              |     |
| 0281 | 136 | head tail adaptor protein (SfII, <a href="#">YP_008318487</a> )                                     | 95  |
| 0282 | 107 | head-tail connector protein (SfII, <a href="#">YP_008318486</a> )                                   | 94  |
| 0283 | 66  | Putative phage protein SfII_007 (SfII, <a href="#">AFR52515</a> )                                   | 97  |
| 0284 | 203 | major head protein (SfIV, <a href="#">YP_008766869</a> )                                            | 99  |
| 0285 | 91  | transposase ( <i>E. coli</i> , <a href="#">WP_001370105</a> )                                       | 100 |
| 0286 | 295 | IS629 ORF2 ( <i>S. boydii</i> , <a href="#">YP_406278</a> )                                         | 100 |
| 0287 | 227 | diacetylchitobiose permease ( <i>E. coli</i> , <a href="#">WP_000379769</a> )                       | 99  |
|      |     | PTS N'-diacetylchitobiose transporter subunit IIC ( <i>E. coli</i> , <a href="#">WP_001338139</a> ) | 99  |

---

<sup>a</sup>. ORFs are showed as locus\_tag numbers annotated in contig NZ\_AERO01000013 of strain CDC796-83
